# Supplementary material
Source: PubMed Central journal article supplement (PMC5473951)
Supplement: NIHMS866301-supplement-Supplemental_Material.pdf [file NIHMS866301-supplement-Supplemental_Material.pdf]

Supplementary Tables and Figures

Formatted: Numbering: Continuous

eTable 1. Subsequent neoplasm diagnoses (and number of affected individuals) by primary childhood cancer diagnosis.

| Childhood Cancer Diagnosis                          | Subsequent neoplasm | All types          | Leukemia       |                |              | Lymphoma         |                      |              | Central nervous system |                                                     |                                   |                |
|-----------------------------------------------------|---------------------|--------------------|----------------|----------------|--------------|------------------|----------------------|--------------|------------------------|-----------------------------------------------------|-----------------------------------|----------------|
|                                                     |                     |                    | ALL            | AML            | Other        | Hodgkin lymphoma | Non-Hodgkin lymphoma | Other        | Gliial                 | Medulloblastoma/<br>Primitive neuroectodermal tumor | Meningioma (benign and malignant) | Other          |
|                                                     |                     |                    |                |                |              |                  |                      |              |                        |                                                     |                                   |                |
| Acute lymphoblastic leukemia                        |                     | 782 (410)          | 1 (1)          | 12 (12)        | 2 (2)        | 2 (2)            | 3 (3)                | 1 (1)        | 38 (37)                | 3 (3)                                               | 120 (104)                         | 3 (3)          |
| Acute myeloblastic leukemia                         |                     | 79 (40)            | 1 (1)          | 0              | 0            | 0                | 0                    | 0            | 1 (1)                  | 1 (1)                                               | 2 (2)                             | 0              |
| Other leukemia                                      |                     | 50 (19)            | 1 (1)          | 0              | 0            | 0                | 0                    | 0            | 2 (2)                  | 0                                                   | 2 (2)                             | 0              |
| Astrocytoma                                         |                     | 171 (114)          | 1 (1)          | 1 (1)          | 1 (1)        | 2 (2)            | 1 (1)                | 0            | 17 (17)                | 1 (1)                                               | 39 (34)                           | 2 (2)          |
| Medulloblastoma/<br>Primitive neuroectodermal tumor |                     | 167 (83)           | 0              | 2 (2)          | 0            | 0                | 1 (1)                | 0            | 9 (8)                  | 0                                                   | 41 (33)                           | 0              |
| Other central nervous system                        |                     | 43 (27)            | 0              | 0              | 0            | 0                | 0                    | 0            | 2 (2)                  | 0                                                   | 12 (11)                           | 0              |
| Hodgkin lymphoma                                    |                     | 1228 (515)         | 1 (1)          | 9 (9)          | 4 (4)        | 1 (1)            | 20 (16)              | 0            | 3 (3)                  | 1 (1)                                               | 4 (4)                             | 4 (4)          |
| Non-Hodgkin lymphoma                                |                     | 163 (101)          | 3 (3)          | 3 (3)          | 1 (1)        | 4 (4)            | 3 (3)                | 0            | 5 (5)                  | 0                                                   | 8 (8)                             | 0              |
| Wilms                                               |                     | 86 (57)            | 2 (2)          | 0              | 0            | 1 (1)            | 0                    | 0            | 0                      | 1 (1)                                               | 0                                 | 0              |
| Neuroblastoma                                       |                     | 69 (61)            | 1 (1)          | 2 (2)          | 0            | 1 (1)            | 2 (2)                | 0            | 1 (1)                  | 0                                                   | 4 (4)                             | 0              |
| Rhabdomyosarcoma                                    |                     | 109 (82)           | 1 (1)          | 0              | 0            | 1 (1)            | 0                    | 0            | 2 (2)                  | 0                                                   | 6 (5)                             | 2 (2)          |
| Ewing sarcoma                                       |                     | 72 (57)            | 1 (1)          | 2 (2)          | 0            | 0                | 0                    | 0            | 0                      | 0                                                   | 1 (1)                             | 0              |
| Osteosarcoma                                        |                     | 93 (70)            | 1 (1)          | 2 (2)          | 0            | 0                | 2 (2)                | 0            | 2 (2)                  | 0                                                   | 1 (1)                             | 0              |
| Other bone                                          |                     | 3 (3)              | 0              | 0              | 0            | 0                | 0                    | 0            | 0                      | 0                                                   | 0                                 | 0              |
| <b>TOTAL</b>                                        |                     | <b>3115 (1639)</b> | <b>14 (14)</b> | <b>33 (33)</b> | <b>8 (8)</b> | <b>12 (12)</b>   | <b>32 (28)</b>       | <b>1 (1)</b> | <b>82 (80)</b>         | <b>7 (7)</b>                                        | <b>240 (209)</b>                  | <b>11 (11)</b> |

8  
9  
10  
11  
12  
13  
14  
15

eTable 1 (continued). Subsequent neoplasm diagnoses (and number of affected individuals) by primary childhood cancer diagnosis.

| Subsequent neoplasm<br><br>Childhood Cancer Diagnosis | Solid organ      |                |                     |                  | Other cancers    | Skin           |                          |
|-------------------------------------------------------|------------------|----------------|---------------------|------------------|------------------|----------------|--------------------------|
|                                                       | Breast           | Bone           | Soft tissue sarcoma | Thyroid          |                  | Melanoma       | Non-melanoma skin cancer |
| Acute lymphoblastic leukemia                          | 14 (14)          | 6 (6)          | 5 (5)               | 31 (31)          | 32 (31)          | 8 (8)          | 501 (183)                |
| Acute myeloblastic leukemia                           | 5 (5)            | 0              | 3 (3)               | 7 (7)            | 5 (5)            | 0              | 54 (19)                  |
| Other leukemia                                        | 1 (1)            | 0              | 0                   | 9 (9)            | 6 (6)            | 2 (2)          | 27 (6)                   |
| Astrocytoma                                           | 5 (4)            | 3 (3)          | 5 (5)               | 3 (3)            | 13 (13)          | 7 (6)          | 70 (33)                  |
| Medulloblastoma/<br>Primitive neuroectodermal tumor   | 0                | 1 (1)          | 4 (3)               | 16 (16)          | 6 (6)            | 0              | 87 (25)                  |
| Other central nervous system                          | 0                | 1 (1)          | 2 (2)               | 6 (6)            | 3 (3)            | 1 (1)          | 16 (5)                   |
| Hodgkin lymphoma                                      | 142 (124)        | 9 (9)          | 25 (25)             | 64 (64)          | 58 (58)          | 12 (12)        | 871 (256)                |
| Non-Hodgkin lymphoma                                  | 10 (10)          | 3 (3)          | 3 (3)               | 13 (13)          | 19 (18)          | 5 (4)          | 83 (35)                  |
| Wilms                                                 | 6 (6)            | 5 (5)          | 7 (7)               | 6 (6)            | 11 (11)          | 2 (2)          | 45 (19)                  |
| Neuroblastoma                                         | 2 (2)            | 2 (2)          | 4 (4)               | 14 (14)          | 19 (19)          | 0              | 17 (12)                  |
| Rhabdomyosarcoma                                      | 9 (9)            | 10 (10)        | 20 (20)             | 8 (8)            | 11 (11)          | 4 (4)          | 35 (20)                  |
| Ewing sarcoma                                         | 15 (13)          | 9 (9)          | 3 (3)               | 6 (6)            | 7 (7)            | 4 (4)          | 24 (13)                  |
| Osteosarcoma                                          | 22 (17)          | 0              | 7 (6)               | 9 (9)            | 16 (16)          | 6 (6)          | 25 (18)                  |
| Other bone                                            | 0                | 0              | 0                   | 2 (2)            | 0                | 0              | 1 (1)                    |
| <b>TOTAL</b>                                          | <b>231 (205)</b> | <b>49 (49)</b> | <b>88 (86)</b>      | <b>194 (194)</b> | <b>206 (204)</b> | <b>51 (49)</b> | <b>1856 (645)</b>        |

16

17 **eTable 2. Observed and expected subsequent malignant neoplasms, standardized incidence ratios and median time to occurrence, by**  
 18 **decade of diagnosis.**

| Subsequent malignant neoplasm | Overall Cohort        |          |                    |                                    | 1970-79               |          |                    |                                    |
|-------------------------------|-----------------------|----------|--------------------|------------------------------------|-----------------------|----------|--------------------|------------------------------------|
|                               | Observed <sup>a</sup> | Expected | SIR (95% CI)       | Median time to occurrence, y (IQR) | Observed <sup>a</sup> | Expected | SIR (95% CI)       | Median time to occurrence, y (IQR) |
| <b>All</b>                    | 1086.7                | 201.4    | 5.4 (5.1 - 5.7)    | 17.1 (11.2 - 22.8)                 | 523.0                 | 99.2     | 5.3 (4.8 - 5.7)    | 21.7 (14.6 - 26.7)                 |
| <b>Leukemia</b>               | 64.0                  | 11.5     | 5.5 (4.3 - 7.1)    | 9.0 (6.2 - 14.2)                   | 15.0                  | 4.0      | 3.7 (2.1 - 6.1)    | 8.9 (7.5 - 24.7)                   |
| Acute lymphoblastic leukemia  | 14.0                  | 5.1      | 2.7 (1.5 - 4.6)    | 13.3 (6.6 - 20.0)                  | 4.0                   | 1.5      | 2.7 (0.7 - 6.8)    | 26.1 (13.8 - 31.1)                 |
| Acute myeloblastic leukemia   | 36.7                  | 3.6      | 10.3 (7.2 - 14.2)  | 7.8 (6.2 - 13.4)                   | 7.0                   | 1.4      | 5.2 (2.1 - 10.6)   | 8.1 (7.1 - 12.5)                   |
| Other                         | 10.3                  | 2.5      | 4.2 (2.0 - 7.6)    | 14.1 (5.8 - 14.1)                  | 1.0                   | 1.0      | 1.0 (0.0 - 5.5)    | 14.2 (14.2 - 14.2)                 |
| <b>Lymphoma</b>               | 45.0                  | 28.5     | 1.6 (1.2 - 2.1)    | 17.9 (12.7 - 25.1)                 | 24.0                  | 12.0     | 2.0 (1.3 - 3.0)    | 24.3 (16.2 - 28.5)                 |
| <b>Central nervous system</b> | 131.8                 | 12.1     | 10.8 (9.1 - 12.9)  | 10.9 (7.8 - 15.2)                  | 41.0                  | 4.3      | 9.6 (6.9 - 13.0)   | 18.3 (12.1 - 24.6)                 |
| Glial                         | 103.9                 | 9.4      | 11.0 (9.0 - 13.4)  | 9.4 (7.4 - 13.2)                   | 27.0                  | 3.5      | 7.7 (5.1 - 11.2)   | 14.0 (10.2 - 23.9)                 |
| Medulloblastoma               | 9.6                   | 1.2      | 8.3 (3.9 - 15.5)   | 9.2 (8.8 - 13.8)                   | 3.0                   | 0.3      | 9.9 (2.0 - 29.0)   | 14.6 (9.4 - 24.2)                  |
| <b>Breast</b>                 | 231.0                 | 25.0     | 9.2 (8.1 - 10.5)   | 21.5 (17.1 - 26.4)                 | 159.0                 | 16.9     | 9.4 (8.0 - 11.0)   | 24.1 (19.3 - 27.7)                 |
| <b>Bone</b>                   | 49.2                  | 4.1      | 12.0 (8.9 - 15.9)  | 10.0 (8.2 - 12.9)                  | 23.0                  | 1.2      | 18.4 (11.7 - 27.7) | 11.0 (8.5 - 17.9)                  |
| Osteosarcoma                  | 39.2                  | 2.0      | 19.7 (14.0 - 26.9) | 9.8 (8.2 - 12.7)                   | 18.0                  | 0.5      | 33.5 (19.8 - 52.9) | 10.6 (8.5 - 12.4)                  |
| Ewing sarcoma                 | 3.0                   | 1.0      | 2.9 (0.6 - 8.4)    | 14.7 (11.9 - 16.3)                 | 1.0                   | 0.3      | 3.4 (0.0 - 18.8)   | 16.3 (16.3 - 16.3)                 |
| Other bone                    | 6.0                   | 1.0      | 6.2 (2.3 - 13.5)   | 12.1 (9.8 - 23.2)                  | 3.0                   | 0.4      | 7.8 (1.6 - 22.7)   | 23.2 (12.4 - 26.7)                 |
| <b>Soft tissue sarcoma</b>    | 88.2                  | 12.4     | 7.1 (5.7 - 8.8)    | 15.2 (10.6 - 20.7)                 | 43.0                  | 6.0      | 7.2 (5.2 - 9.7)    | 17.1 (11.2 - 26.6)                 |
| <b>Thyroid</b>                | 204.8                 | 19.6     | 10.5 (9.1 - 12.0)  | 18.7 (13.8 - 22.2)                 | 84.0                  | 8.1      | 10.3 (8.2 - 12.8)  | 20.1 (15.4 - 25.7)                 |
| <b>Melanoma</b>               | 56.3                  | 21.7     | 2.6 (2.0 - 3.4)    | 18.3 (13.2 - 22.1)                 | 26.0                  | 10.3     | 2.5 (1.6 - 3.7)    | 22.1 (14.7 - 27.0)                 |
| <b>All Others</b>             | 195.5                 | 66.5     | 2.9 (2.5 - 3.4)    | 16.3 (10.2 - 23.8)                 | 95.0                  | 36.3     | 2.6 (2.1 - 3.2)    | 21.4 (14.7 - 26.9)                 |

19 <sup>a</sup> Analyses, including reported percentages and means/medians, were weighted to account for undersampling of acute lymphoblastic leukemia (ALL)  
 20 survivors (1987-1999), with a weight of 1.21 for ALL age 0 or 11-20 years at diagnosis, and a weight of 3.63 for those aged 1-10 years.  
 21 Abbreviations: IQR, interquartile range; SIR, standardized incidence ratio.  
 22  
 23  
 24

25  
26

**eTable 2 (continued). Observed and expected subsequent malignant neoplasms, standardized incidence ratios and median time to occurrence, by decade of diagnosis.**

|                                      | 1980-89               |          |                    |                                    | 1990-99               |          |                   |                                    |
|--------------------------------------|-----------------------|----------|--------------------|------------------------------------|-----------------------|----------|-------------------|------------------------------------|
|                                      | Observed <sup>a</sup> | Expected | SIR (95% CI)       | Median time to occurrence, y (IQR) | Observed <sup>a</sup> | Expected | SIR (95% CI)      | Median time to occurrence, y (IQR) |
| <b>Subsequent malignant neoplasm</b> |                       |          |                    |                                    |                       |          |                   |                                    |
| <b>All</b>                           | 391.0                 | 68.7     | 5.7 (5.1 - 6.3)    | 16.1 (9.9 - 20.5)                  | 172.7                 | 33.5     | 5.2 (4.4 - 6.0)   | 11.1 (8.3 - 14.7)                  |
| <b>Leukemia</b>                      | 28.6                  | 4.4      | 6.5 (4.4 - 9.4)    | 7.1 (6.1 - 15.0)                   | 20.3                  | 3.1      | 6.5 (4.0 - 10.0)  | 9.0 (6.1 - 14.1)                   |
| Acute lymphoblastic leukemia         | 9.0                   | 1.9      | 4.7 (2.1 - 8.9)    | 10.5 (6.3 - 15.0)                  | 1.0                   | 1.7      | 0.6 (0.0 - 3.3)   | 14.1 (14.1 - 14.1)                 |
| Acute myeloblastic leukemia          | 17.6                  | 1.4      | 12.6 (7.4 - 20.1)  | 6.9 (6.0 - 14.5)                   | 12.1                  | 0.8      | 14.8 (7.7 - 25.8) | 9.0 (6.2 - 13.4)                   |
| Other                                | 2.0                   | 0.9      | 2.2 (0.2 - 7.9)    | 13.8 (5.1 - 22.4)                  | 7.3                   | 0.5      | 13.5 (5.5 - 27.5) | 9.9 (5.8 - 14.1)                   |
| <b>Lymphoma</b>                      | 15.0                  | 10.6     | 1.4 (0.8 - 2.3)    | 14.4 (12.5 - 20.2)                 | 6.0                   | 5.9      | 1.0 (0.4 - 2.2)   | 9.2 (6.8 - 13.0)                   |
| <b>Central nervous system</b>        | 54.6                  | 4.7      | 11.5 (8.7 - 15.0)  | 9.2 (6.2 - 12.9)                   | 36.2                  | 3.1      | 11.6 (8.1 - 16.0) | 8.3 (7.4 - 12.2)                   |
| Glial                                | 44.0                  | 3.6      | 12.1 (8.8 - 16.2)  | 9.2 (6.2 - 12.0)                   | 33.0                  | 2.3      | 14.4 (9.9 - 20.2) | 8.3 (7.4 - 12.2)                   |
| Medulloblastoma                      | 6.6                   | 0.5      | 13.5 (5.3 - 28.4)  | 8.8 (8.8 - 9.2)                    | 0.0                   | 0.4      | 0.0 (. - 10.1)    |                                    |
| <b>Breast</b>                        | 60.0                  | 6.5      | 9.2 (7.0 - 11.8)   | 19.2 (15.9 - 21.7)                 | 12.0                  | 1.5      | 7.8 (4.0 - 13.6)  | 12.9 (8.7 - 17.1)                  |
| <b>Bone</b>                          | 21.0                  | 1.6      | 12.8 (7.9 - 19.6)  | 9.5 (8.2 - 12.7)                   | 5.2                   | 1.2      | 4.3 (1.4 - 10.0)  | 10.5 (9.0 - 11.7)                  |
| Osteosarcoma                         | 17.0                  | 0.8      | 20.9 (12.1 - 33.4) | 9.2 (8.2 - 12.7)                   | 4.2                   | 0.6      | 6.6 (1.9 - 16.6)  | 9.0 (7.6 - 10.5)                   |
| Ewing sarcoma                        | 2.0                   | 0.4      | 4.8 (0.5 - 17.3)   | 13.3 (11.9 - 14.7)                 | 0.0                   | 0.3      | 0.0 (. - 11.0)    |                                    |
| Other bone                           | 2.0                   | 0.4      | 5.3 (0.6 - 19.1)   | 8.1 (6.4 - 9.8)                    | 1.0                   | 0.2      | 4.8 (0.1 - 26.9)  | 11.7 (11.7 - 11.7)                 |
| <b>Soft tissue sarcoma</b>           | 32.2                  | 4.3      | 7.6 (5.2 - 10.7)   | 16.0 (9.6 - 20.6)                  | 13.0                  | 2.1      | 6.1 (3.2 - 10.4)  | 11.2 (10.1 - 13.3)                 |
| <b>Thyroid</b>                       | 83.3                  | 7.5      | 11.2 (8.9 - 13.8)  | 19.7 (15.9 - 21.6)                 | 37.5                  | 4.0      | 9.4 (6.6 - 12.9)  | 13.0 (10.7 - 17.4)                 |
| <b>Melanoma</b>                      | 16.0                  | 7.9      | 2.0 (1.2 - 3.3)    | 18.8 (14.1 - 21.9)                 | 14.3                  | 3.5      | 4.0 (2.2 - 6.7)   | 12.1 (11.0 - 15.9)                 |
| <b>All Others</b>                    | 74.3                  | 21.2     | 3.5 (2.8 - 4.4)    | 14.4 (8.3 - 20.7)                  | 26.3                  | 9.0      | 2.9 (1.9 - 4.3)   | 8.9 (8.3 - 15.7)                   |

<sup>a</sup> Analyses, including reported percentages and means/medians, were weighted to account for undersampling of acute lymphoblastic leukemia (ALL) survivors (1987-1999), with a weight of 1.21 for ALL age 0 or 11-20 years at diagnosis, and a weight of 3.63 for those aged 1-10 years. Abbreviations: IQR, interquartile range; SIR, standardized incidence ratio.

27  
28  
29  
30  
31  
32  
33

34 **eTable 3. Cumulative incidence at 15 years, SIR, and absolute excess risk per 1000 person years for subsequent malignant neoplasms,**  
 35 **for each childhood cancer diagnosis, by decade of diagnosis.**

| Childhood cancer diagnosis    | Overall cohort    |                               |                                   | 1970-79           |                               |                                   | 1980-89           |                               |                                   | 1990-99          |                               |                                   |
|-------------------------------|-------------------|-------------------------------|-----------------------------------|-------------------|-------------------------------|-----------------------------------|-------------------|-------------------------------|-----------------------------------|------------------|-------------------------------|-----------------------------------|
|                               | SIR (95% CI)      | Absolute Excess Risk (95% CI) | Cumulative Incidence (%) (95% CI) | SIR (95% CI)      | Absolute Excess Risk (95% CI) | Cumulative Incidence (%) (95% CI) | SIR (95% CI)      | Absolute Excess Risk (95% CI) | Cumulative Incidence (%) (95% CI) | SIR (95% CI)     | Absolute Excess Risk (95% CI) | Cumulative Incidence (%) (95% CI) |
| All diagnoses                 | 5.4 (5.1 - 5.7)   | 2.1 (2.0 - 2.3)               | 1.7 (1.5 - 1.8)                   | 5.3 (4.8 - 5.7)   | 3.0 (2.7 - 3.4)               | 2.1 (1.7 - 2.4)                   | 5.7 (5.1 - 6.3)   | 2.0 (1.7 - 2.2)               | 1.7 (1.5 - 2.0)                   | 5.2 (4.4 - 6.0)  | 1.2 (1.0 - 1.5)               | 1.3 (1.1 - 1.5)                   |
| Hodgkin lymphoma              | 7.7 (6.9 - 8.6)   | 6.1 (5.4 - 6.9)               | 3.6 (3.0 - 4.3)                   | 7.9 (6.9 - 9.0)   | 8.0 (6.8 - 9.3)               | 4.8 (3.6 - 6.1)                   | 7.9 (6.4 - 9.6)   | 5.1 (4.0 - 6.4)               | 3.1 (2.0 - 4.1)                   | 6.1 (4.1 - 8.7)  | 2.8 (1.7 - 4.2)               | 2.6 (1.4 - 3.7)                   |
| Non-Hodgkin lymphoma          | 4.2 (3.3 - 5.3)   | 1.8 (1.3 - 2.4)               | 1.2 (0.7 - 1.7)                   | 3.8 (2.6 - 5.4)   | 2.1 (1.2 - 3.4)               | 0.9 (0.0 - 1.7)                   | 5.1 (3.5 - 7.3)   | 2.1 (1.3 - 3.1)               | 1.5 (0.6 - 2.3)                   | 3.5 (1.7 - 6.4)  | 0.9 (0.3 - 2.0)               | 1.1 (0.4 - 1.9)                   |
| Rhabdomyosarcoma              | 7.5 (5.9 - 9.5)   | 3.0 (2.3 - 4.0)               | 2.6 (1.7 - 3.5)                   | 7.2 (5.1 - 9.9)   | 3.8 (2.5 - 5.4)               | 2.7 (1.1 - 4.4)                   | 9.3 (6.1 - 13.6)  | 3.2 (2.0 - 4.9)               | 3.2 (1.6 - 4.9)                   | 4.6 (1.5 - 10.7) | 1.0 (0.1 - 2.8)               | 1.8 (0.2 - 3.4)                   |
| Neuroblastoma                 | 6.3 (4.7 - 8.4)   | 1.4 (1.0 - 1.9)               | 1.0 (0.6 - 1.5)                   | 5.4 (3.3 - 8.3)   | 1.6 (0.8 - 2.6)               | 1.4 (0.3 - 2.4)                   | 9.1 (5.8 - 13.7)  | 1.8 (1.1 - 2.9)               | 1.4 (0.5 - 2.3)                   | 3.8 (1.2 - 9.0)  | 0.5 (0.0 - 1.4)               | 0.5 (0.0 - 1.0)                   |
| Kidney tumor                  | 3.7 (2.7 - 5.0)   | 0.8 (0.5 - 1.3)               | 0.8 (0.4 - 1.2)                   | 4.0 (2.5 - 6.1)   | 1.3 (0.7 - 2.2)               | 1.3 (0.3 - 2.3)                   | 3.8 (2.1 - 6.3)   | 0.8 (0.3 - 1.4)               | 0.8 (0.2 - 1.4)                   | 2.5 (0.7 - 6.3)  | 0.3 (0 - 1.0)                 | 0.3 (0.0 - 0.8)                   |
| Acute lymphoblastic leukemia  | 4.3 (3.7 - 4.9)   | 1.2 (1.0 - 1.4)               | 1.4 (1.1 - 1.6)                   | 3.5 (2.7 - 4.3)   | 1.4 (1.0 - 1.9)               | 1.1 (0.6 - 1.6)                   | 4.6 (3.7 - 5.6)   | 1.2 (0.9 - 1.6)               | 1.7 (1.3 - 2.2)                   | 5.3 (4.0 - 6.9)  | 1.1 (0.7 - 1.5)               | 1.1 (0.8 - 1.4)                   |
| Acute myeloblastic leukemia   | 4.1 (2.6 - 6.1)   | 1.4 (0.7 - 2.3)               | 0.8 (0.2 - 1.4)                   | 4.8 (2.3 - 8.8)   | 2.8 (1.0 - 5.8)               | 0.8 (0.0 - 2.3)                   | 3.9 (1.8 - 7.5)   | 1.3 (0.3 - 2.8)               | 1.2 (0.0 - 2.4)                   | 3.1 (0.8 - 7.9)  | 0.6 (0 - 2.1)                 | 0.5 (0.0 - 1.2)                   |
| Other leukemia                | 10.9 (6.7 - 16.7) | 4.7 (2.7 - 7.4)               | 2.4 (0.7 - 4.2)                   | 12.4 (5.9 - 22.8) | 6.8 (2.9 - 12.9)              | 4.1 (0.0 - 8.5)                   | 10.9 (4.4 - 22.4) | 4.3 (1.5 - 9.4)               | 1.0 (0.0 - 2.8)                   | 8.4 (2.3 - 21.6) | 2.8 (0.5 - 7.7)               | 2.7 (0.0 - 5.8)                   |
| Bone cancer                   | 4.9 (4.1 - 5.9)   | 3.0 (2.4 - 3.8)               | 2.5 (1.8 - 3.2)                   | 4.5 (3.4 - 5.8)   | 3.5 (2.4 - 4.9)               | 2.8 (1.5 - 4.2)                   | 5.1 (3.7 - 7.0)   | 2.8 (1.8 - 4.0)               | 2.3 (1.2 - 3.4)                   | 6.4 (3.8 - 9.9)  | 2.5 (1.3 - 4.1)               | 2.4 (1.1 - 3.6)                   |
| Ewing                         | 6.7 (4.9 - 8.9)   | 3.8 (2.6 - 5.3)               | 3.1 (1.8 - 4.4)                   | 6.6 (4.2 - 9.9)   | 4.8 (2.7 - 7.6)               | 3.9 (1.3 - 6.6)                   | 8.0 (4.9 - 12.3)  | 4.3 (2.4 - 6.9)               | 3.3 (1.2 - 5.5)                   | 4.1 (1.1 - 10.5) | 1.3 (0.0 - 4.0)               | 1.9 (0.1 - 3.7)                   |
| Osteosarcoma                  | 4.2 (3.2 - 5.3)   | 2.6 (1.8 - 3.5)               | 2.1 (1.3 - 2.9)                   | 3.7 (2.6 - 5.2)   | 2.9 (1.7 - 4.6)               | 2.2 (0.7 - 3.7)                   | 3.9 (2.4 - 5.9)   | 2.0 (1.0 - 3.5)               | 1.7 (0.5 - 2.9)                   | 7.1 (3.8 - 12.2) | 3.0 (1.3 - 5.4)               | 2.3 (0.7 - 3.9)                   |
| Central nervous system cancer | 4.4 (3.6 - 5.3)   | 1.5 (1.2 - 1.9)               | 1.3 (1.0 - 1.7)                   | 3.3 (2.3 - 4.6)   | 1.6 (0.9 - 2.4)               | 1.1 (0.6 - 1.6)                   | 4.8 (3.5 - 6.4)   | 1.6 (1.0 - 2.2)               | 1.1 (0.6 - 1.6)                   | 5.6 (3.9 - 7.8)  | 1.4 (0.9 - 2.1)               | 1.5 (1.0 - 2.1)                   |

36 Abbreviations: CI, confidence interval; SIR, standardized incidence ratio.

37 **eTable 4. Observed and expected numbers of malignant events, by attained age and decade of diagnosis, as included in Figure 2.**

| Attained age | Observed <sup>a</sup> |       |       | Expected, based on SEER |       |       | SIR               |                  |                 |
|--------------|-----------------------|-------|-------|-------------------------|-------|-------|-------------------|------------------|-----------------|
|              | 1970s                 | 1980s | 1990s | 1970s                   | 1980s | 1990s | 1970s             | 1980s            | 1990s           |
| 10-19        | 17.6                  | 14.1  | 13.9  | 1.7                     | 1.7   | 1.7   | 10.6 (8.1 - 13.5) | 8.2 (6.6 - 10.2) | 8.0 (6.3 - 9.9) |
| 20-29        | 25.0                  | 21.3  | 16.2  | 4.5                     | 4.5   | 4.6   | 5.6 (4.7 - 6.6)   | 4.7 (4.0 - 5.6)  | 3.5 (2.7 - 4.6) |
| 30-29        | 56.5                  | 48.8  | 30.3  | 10.5                    | 10.2  | 9.8   | 5.4 (4.7 - 6.2)   | 4.8 (3.9 - 5.8)  | 3.1 (1.8 - 5.0) |

38

39 <sup>a</sup> Analyses, including reported percentages and means/medians, were weighted to account for undersampling of acute lymphoblastic leukemia (ALL) survivors  
 40 (1987-1999), with a weight of 1.21 for ALL age 0 or 11-20 years at diagnosis, and a weight of 3.63 for those aged 1-10 years.

41

42

43 **eTable 5. Standardized incidence ratios of subsequent malignant neoplasms by decade of diagnosis and by attained age groups among**  
 44 **Hodgkin lymphoma survivors.**

|                            | 1970-79            | 1980-89          | 1990-99           | P     |
|----------------------------|--------------------|------------------|-------------------|-------|
| <b>Attained age, years</b> |                    |                  |                   |       |
| 10-19                      | 21.9 (10.0 - 41.7) | 8.0 (1.6 - 23.4) | 17.3 (5.6 - 40.3) | 0.53  |
| 20-29                      | 10.7 (7.7 - 14.4)  | 6.8 (4.4 - 10.0) | 5.5 (3.2 - 9.0)   | 0.016 |
| 30-39                      | 10.2 (8.2 - 12.5)  | 8.4 (6.3 - 11.0) | 5.2 (2.4 - 9.8)   | 0.038 |

45

46

47 eTable 6. Source data<sup>a</sup> for multivariable model presented in Table 2.

| Variable                                                 | N     | Person years | Number of events    |                               |            |                          |
|----------------------------------------------------------|-------|--------------|---------------------|-------------------------------|------------|--------------------------|
|                                                          |       |              | Subsequent neoplasm | Subsequent malignant neoplasm | Meningioma | Non-melanoma skin cancer |
| Sex                                                      |       |              |                     |                               |            |                          |
| Male                                                     | 9898  | 156681       | 1094                | 296                           | 80         | 718                      |
| Female                                                   | 8884  | 144311       | 1368                | 491                           | 112        | 765                      |
| Age at diagnosis                                         |       |              |                     |                               |            |                          |
| 0-4                                                      | 7688  | 125506       | 549                 | 187                           | 95         | 267                      |
| 5-9                                                      | 4258  | 67784        | 387                 | 143                           | 57         | 187                      |
| 10-14                                                    | 3931  | 61861        | 602                 | 213                           | 25         | 364                      |
| 15+                                                      | 2905  | 45841        | 924                 | 244                           | 15         | 665                      |
| Year of diagnosis                                        |       |              |                     |                               |            |                          |
| 1970-74                                                  | 1685  | 43402        | 782                 | 199                           | 53         | 530                      |
| 1975-79                                                  | 2797  | 61502        | 810                 | 197                           | 69         | 544                      |
| 1980-84                                                  | 3928  | 67636        | 490                 | 181                           | 37         | 272                      |
| 1985-89                                                  | 3525  | 55036        | 220                 | 103                           | 17         | 100                      |
| 1990-94                                                  | 3239  | 42824        | 106                 | 67                            | 10         | 29                       |
| 1995-99                                                  | 3608  | 30592        | 54                  | 40                            | 6          | 8                        |
| Maximum radiation treatment dose to any body region (Gy) |       |              |                     |                               |            |                          |
| None                                                     | 8728  | 127682       | 242                 | 160                           | 6          | 76                       |
| 0.1-10                                                   | 262   | 4080         | 36                  | 14                            | 4          | 18                       |
| 10.1-20                                                  | 2737  | 45195        | 277                 | 93                            | 26         | 158                      |
| 20.1-30                                                  | 2416  | 45605        | 451                 | 131                           | 70         | 250                      |
| 30.1-40                                                  | 1296  | 24754        | 582                 | 151                           | 10         | 421                      |
| 40.1-50                                                  | 1507  | 26863        | 622                 | 149                           | 28         | 445                      |
| 50+                                                      | 1836  | 26813        | 252                 | 89                            | 48         | 115                      |
| History of splenectomy (yes/no)                          |       |              |                     |                               |            |                          |
| Yes                                                      | 1107  | 22467        | 792                 | 177                           | 2          | 613                      |
| No                                                       | 17675 | 278525       | 1670                | 610                           | 190        | 870                      |
| Cyclophosphamide equivalent dose (mg/m <sup>2</sup> )    |       |              |                     |                               |            |                          |
| None                                                     | 9139  | 153887       | 1178                | 321                           | 126        | 731                      |
| 1-3999                                                   | 2421  | 35854        | 178                 | 76                            | 11         | 91                       |
| 4000-7999                                                | 2479  | 36934        | 301                 | 115                           | 17         | 169                      |
| 8000+                                                    | 4743  | 74316        | 805                 | 275                           | 38         | 492                      |
| Anthracycline (mg/m <sup>2</sup> )                       |       |              |                     |                               |            |                          |
| None                                                     | 10039 | 174654       | 1742                | 473                           | 152        | 1117                     |
| 0-100                                                    | 1276  | 17453        | 80                  | 27                            | 9          | 44                       |
| 101-300                                                  | 4553  | 62099        | 386                 | 149                           | 16         | 221                      |
| >300                                                     | 2914  | 46787        | 254                 | 138                           | 15         | 101                      |

48 **eTable 6 (continued). Source data<sup>a</sup> for multivariable model presented in Table 2.**

| Variable                                | N     | Person years | Number of events    |                               |            |                          |
|-----------------------------------------|-------|--------------|---------------------|-------------------------------|------------|--------------------------|
|                                         |       |              | Subsequent neoplasm | Subsequent malignant neoplasm | Meningioma | Non-melanoma skin cancer |
| Epipodophyllotoxin (mg/m <sup>2</sup> ) |       |              |                     |                               |            |                          |
| None                                    | 15538 | 261199       | 2293                | 707                           | 171        | 1415                     |
| 1-1000                                  | 874   | 11114        | 77                  | 24                            | 9          | 44                       |
| 1001-4000                               | 1611  | 19107        | 54                  | 29                            | 5          | 20                       |
| >4000                                   | 759   | 9572         | 38                  | 27                            | 7          | 4                        |
| Platinum (mg/m <sup>2</sup> )           |       |              |                     |                               |            |                          |
| None                                    | 16754 | 276423       | 2338                | 719                           | 171        | 1448                     |
| 1-400                                   | 700   | 9008         | 47                  | 20                            | 10         | 17                       |
| 401-750                                 | 664   | 8479         | 46                  | 29                            | 5          | 12                       |
| >750                                    | 664   | 7082         | 31                  | 19                            | 6          | 6                        |

49 <sup>a</sup>Includes survivors with non-missing data on all treatment variables, consistent with the analysis cohort of Table 2.

50  
51  
52  
53



54 | eFigure 1. The causal diagram of the mediation analysis for the association of treatment era and subsequent neoplasm rates, mediated  
55 | by radiation and chemotherapy dosing.

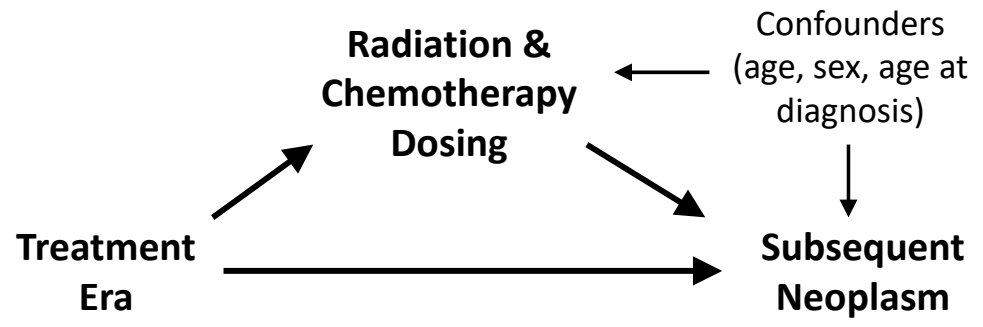

56  
57  
58

59 eFigure 2. Cumulative incidence of subsequent neoplasms (A) and subsequent malignant neoplasms (B), by initial cancer diagnosis and  
 60 decade of initial cancer diagnosis.

61 A.

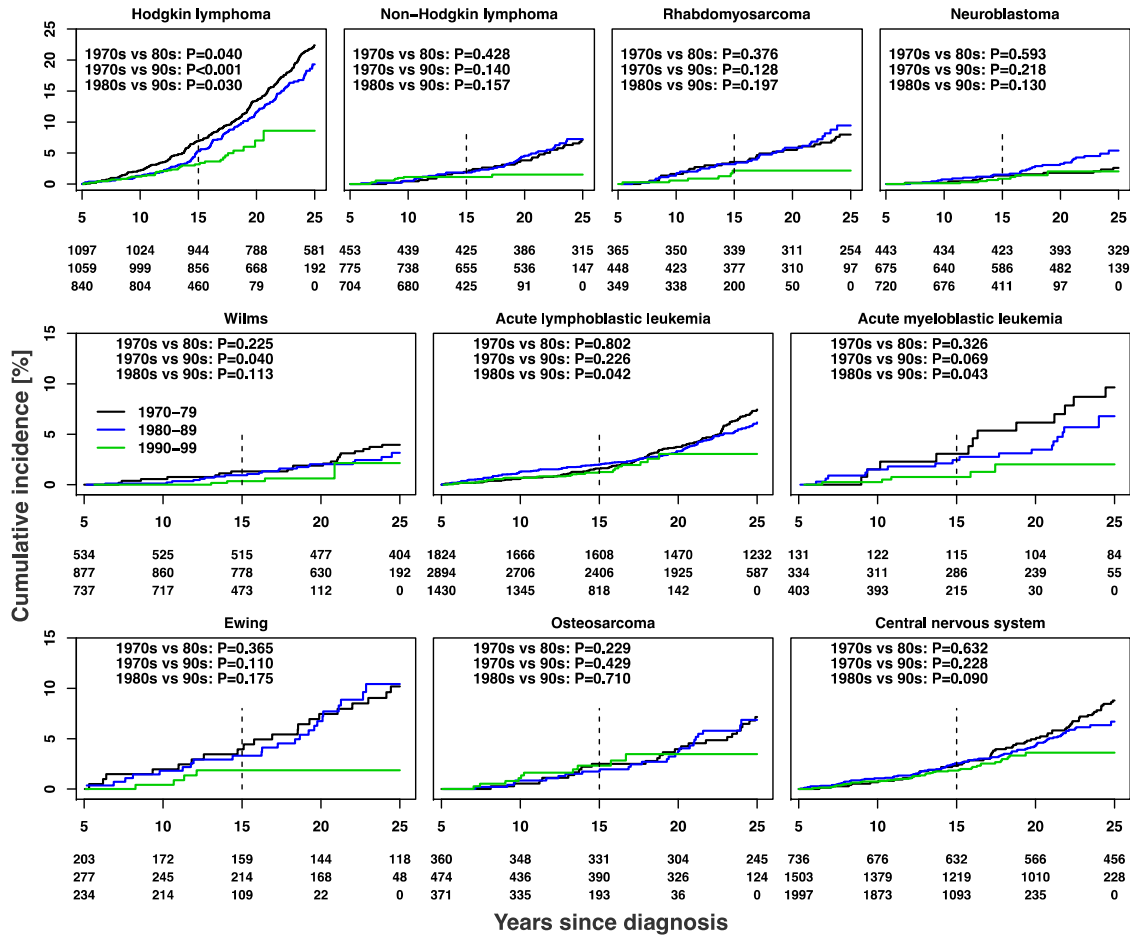

62  
 63 Permutation tests were used to assess differences between curves. Number of individuals at risk for each time point is listed below the x-axis (1970s top,  
 64 1980s middle, 1990s bottom). Vertical dashed line at 15 year mark represents the time point of interest.

65 eFigure 2 (continued). Cumulative incidence of subsequent neoplasms (A) and subsequent malignant neoplasms (B), by initial cancer diagnosis and decade of initial cancer diagnosis.  
 66

67 B.

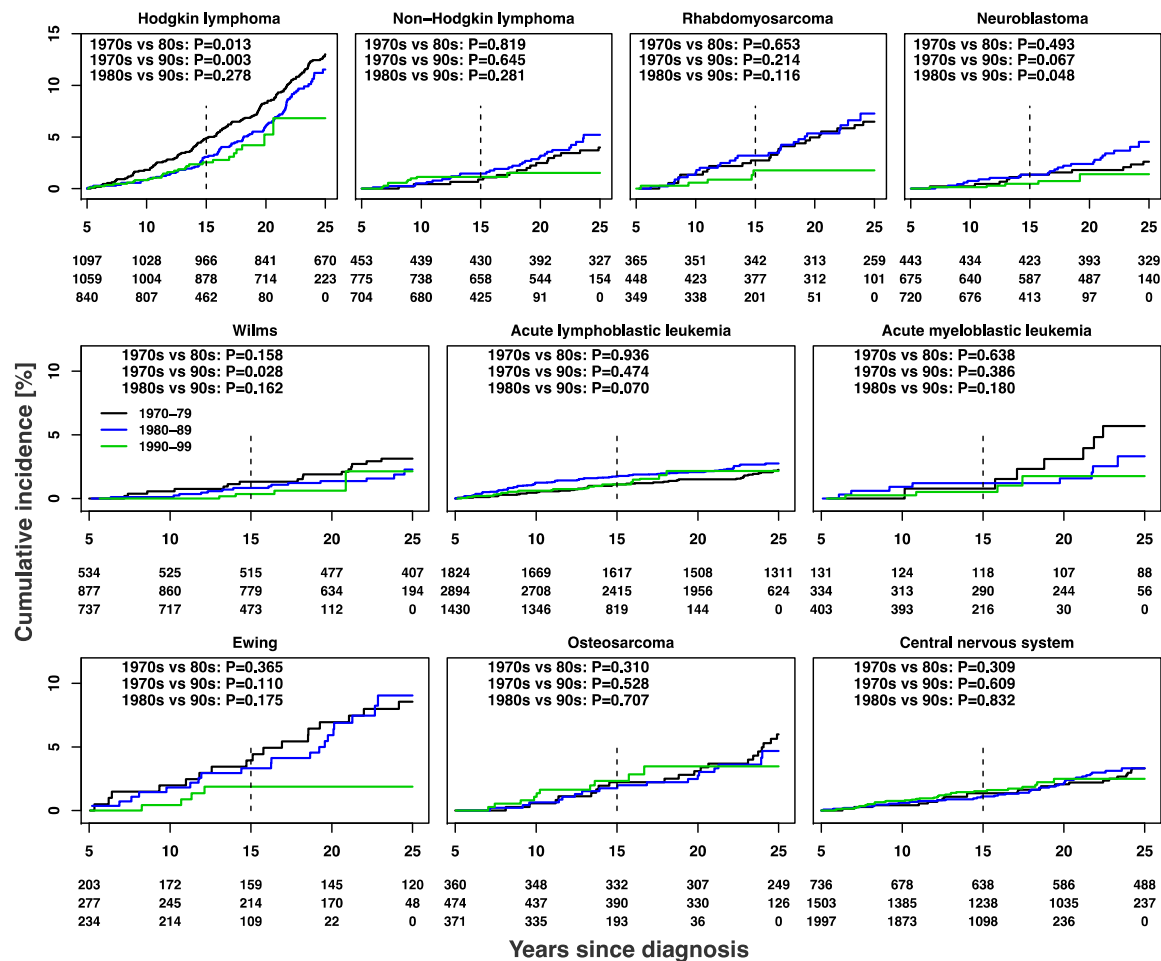

68  
 69 Permutation tests were used to assess differences between curves. Number of individuals at risk for each time point is listed below the x-axis (1970s top,  
 70 1980s middle, 1990s bottom). Vertical dashed line at 15 year mark represents the time point of interest.

71  
72

**eFigure 3. Cumulative incidence of specific SMN types, by decade of initial cancer diagnosis.**

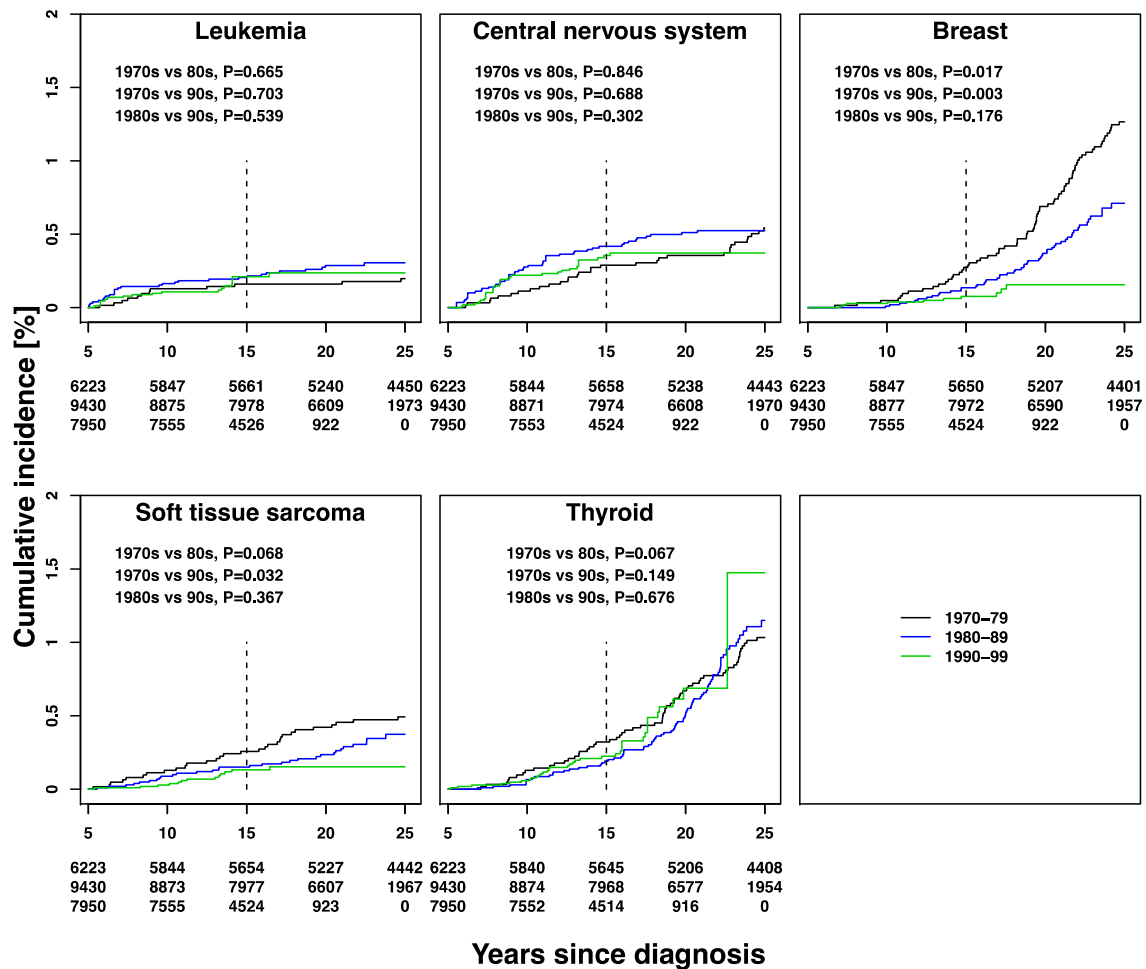

Permutation tests were used to assess differences between curves. **Number of individuals at risk for each time point is listed below the x-axis (1970s top, 1980s middle, 1990s bottom).** Vertical dashed line at 15 year mark represents the time point of interest.

73  
74  
75  
76

77 eFigure 4. Cumulative incidence (A) and cumulative burden (mean cumulative count per 100 survivors) (B) of subsequent neoplasms, by  
 78 type, decade of initial cancer diagnosis and therapeutic radiation exposure. Radiation exposed are in the top row, unexposed are in the  
 79 bottom row.  
 80 A.

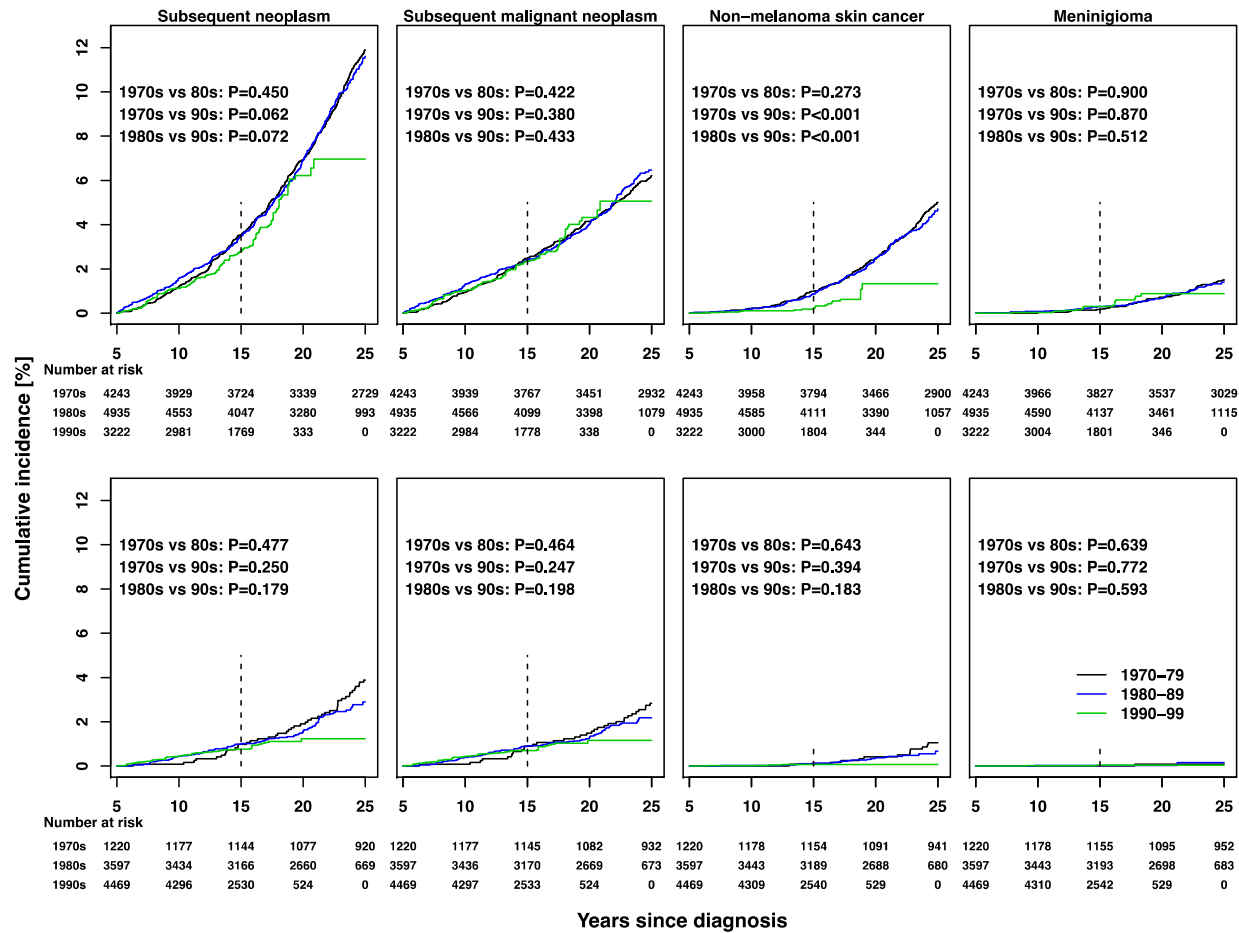

81  
 82 Permutation tests were used to assess differences between curves. Number of individuals at risk for each time point is listed below the x-axis (1970s top,  
 83 1980s middle, 1990s bottom). Vertical dashed line at 15 year mark represents the time point of interest.

84  
85  
86  
87  
88  
89

**eFigure 4 (continued). Cumulative incidence (A) and cumulative burden (mean cumulative count per 100 survivors) (B) of subsequent neoplasms, by type, decade of initial cancer diagnosis and therapeutic radiation exposure. Radiation exposed are in the top row, unexposed are in the bottom row.**

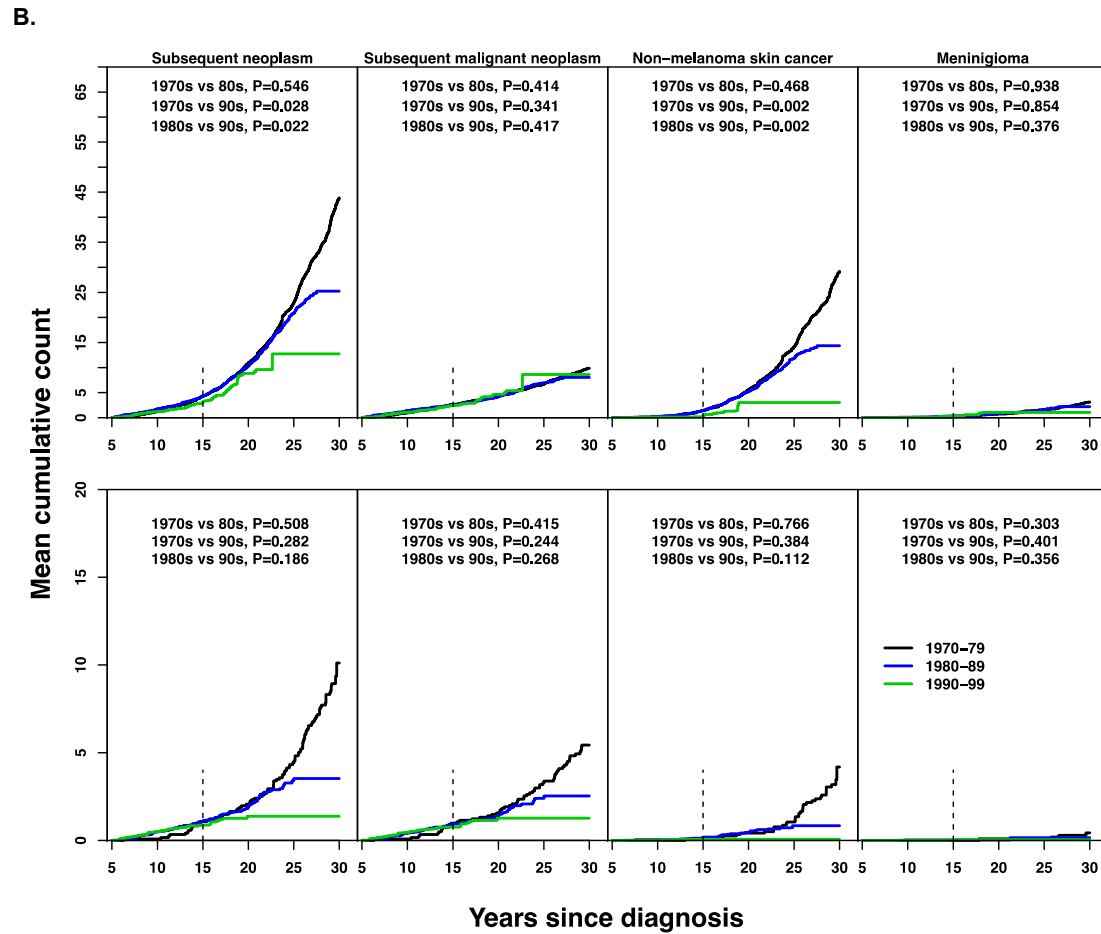

90  
91 Permutation tests were used to assess differences between curves. Vertical dashed line at 15 year mark represents the time point of interest.

**Figure 5. Standardized incidence ratios for select subsequent malignant neoplasm diagnoses, by attained age and decade of diagnosis.** Vertical bars represent 95% confidence intervals.

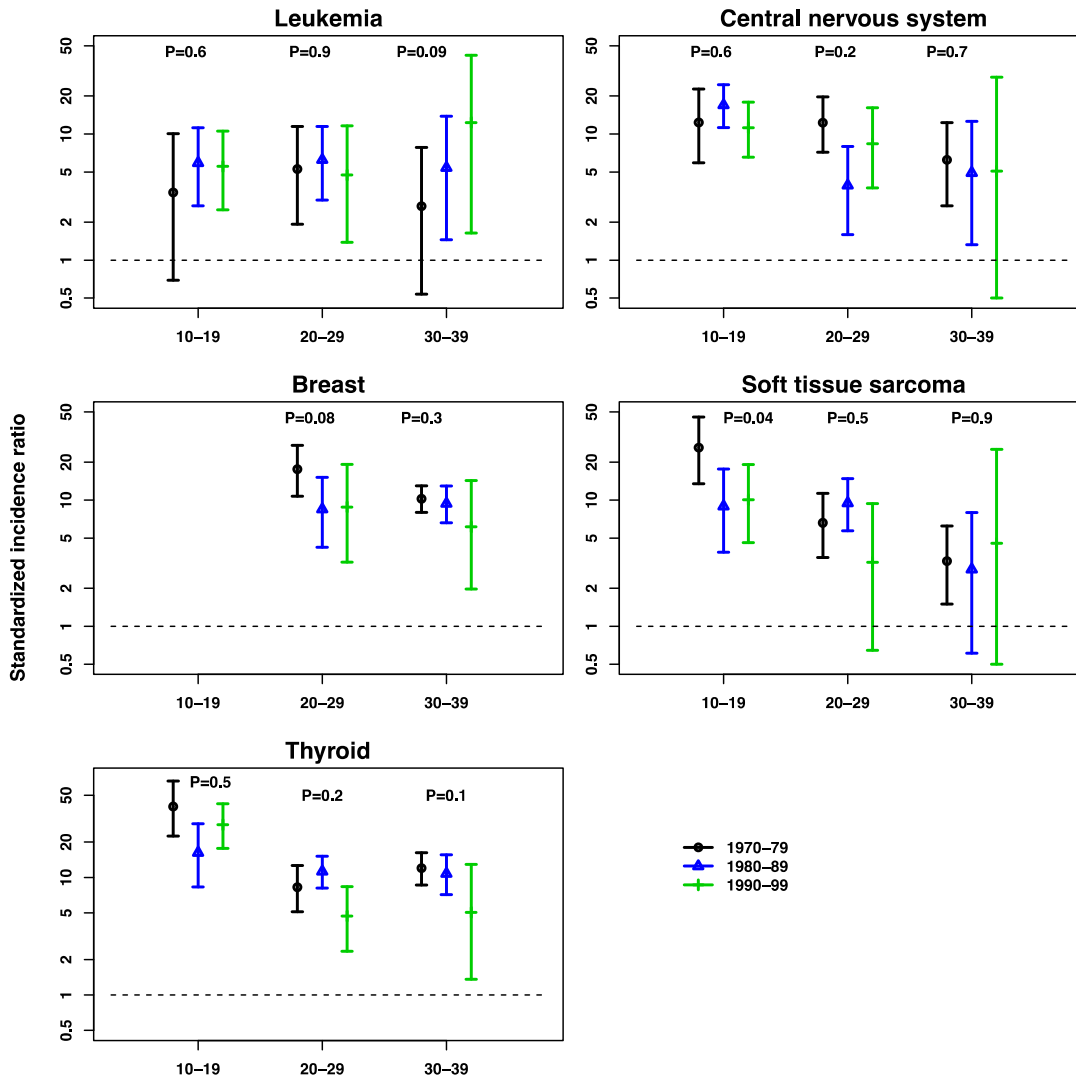

Standardized incidence ratio (SIR) = observed number of events/expected number of events. SIRs calculated using age-sex-calendar-year-specific U.S. cancer incidence rates from the Surveillance, Epidemiology, and End Results program to determine expected numbers of events. Analyses were weighted to account for undersampling of acute lymphoblastic leukemia (ALL) survivors (1987-1999), with a weight of 1.21 for ALL age 0 or 11-20 years at diagnosis, and a weight of 3.63 for those aged 1-10 years.

The number of individuals from each decade of diagnosis contributing data for each attained age are as follows: 1970s, 10-19 years 5,072; 20-29 years 5,810; 30-39 years 4,809; 1980s, 10-19 years 7,932; 20-29 years 8,283; 30-39 years 3,901; 1990s, 10-19 years 6,622; 20-29 years 5,517; 30-39 years 1,534.
